# Supplementary material for: Non-coding and Coding Transcriptional Profiles Are Significantly Altered in Pediatric Retinoblastoma Tumors
Source: PubMed Central journal article supplement (PMC6477087; doi:10.3389/fonc.2019.00221), 2019-04-16
Supplement: Presentation_1.pdf [file Presentation_1.pdf]

| Patient ID | Sample No | Sample ID | Total Reads | Total data (GB) | Average read length (bp) | Avg. base quality (Phred) | Total data >= Q30 (%) | Total data >= Q20 (%) | GC (%) |
|------------|-----------|-----------|-------------|-----------------|--------------------------|---------------------------|-----------------------|-----------------------|--------|
| C1         | 1         | 48428     | 160749358   | 16.07           | 100                      | 35.08                     | 92.31                 | 95.50                 | 49.84  |
| 1          | 2         | 48429     | 115547718   | 11.55           | 100                      | 34.76                     | 91.34                 | 94.64                 | 49.70  |
| 2          | 3         | 48430     | 89844222    | 8.98            | 100                      | 34.61                     | 90.75                 | 94.15                 | 45.75  |
| 3          | 5         | 48432     | 100707208   | 10.07           | 100                      | 32.39                     | 83.73                 | 87.76                 | 49.49  |
| 4          | 6         | 48433     | 105656294   | 10.57           | 100                      | 32.86                     | 83.31                 | 89.20                 | 47.29  |
| 5          | 7         | 48434     | 123753520   | 12.38           | 100                      | 33.43                     | 85.06                 | 90.85                 | 47.95  |
| 6          | 8         | 48435     | 130395444   | 13.04           | 100                      | 33.28                     | 84.40                 | 90.45                 | 46.89  |
| C2         | 9         | 48436     | 137292256   | 13.73           | 100                      | 33.11                     | 83.90                 | 90.00                 | 49.45  |
| 7          | 10        | 48437     | 81481032    | 8.15            | 100                      | 30.67                     | 76.26                 | 82.97                 | 51.53  |

**Supp. Table 1: Raw RNA-seq Data from retina and Retinoblastoma samples**

**Supp Table1**

| Patient ID | Sample No | Sample ID | Total Reads | Reads After Adapter Trimming | Reads After Contamination Removal | Aligned Reads |
|------------|-----------|-----------|-------------|------------------------------|-----------------------------------|---------------|
| C1         | 1         | 48428     | 155890558   | 151413666                    | 124041344                         | 27372322      |
| 1          | 2         | 48429     | 109487988   | 98538684                     | 44849696                          | 53688988      |
| 2          | 3         | 48430     | 84750392    | 80783782                     | 47515072                          | 33268710      |
| 3          | 5         | 48432     | 76820448    | 72007794                     | 32014848                          | 39992946      |
| 4          | 6         | 48433     | 93770106    | 92569040                     | 70279216                          | 22289824      |
| 5          | 7         | 48434     | 114257030   | 113097440                    | 86073066                          | 27024374      |
| 6          | 8         | 48435     | 119992008   | 115365816                    | 84183876                          | 31181940      |
| C2         | 9         | 48436     | 125180718   | 119513224                    | 88776972                          | 30736252      |
| 7          | 10        | 48437     | 57498540    | 57287434                     | 587234                            | 56700200      |

**Supp. Table 2: Number of RNA-seq reads from retina and Retinoblastoma samples used for genome alignment**

**Supp Table 2**

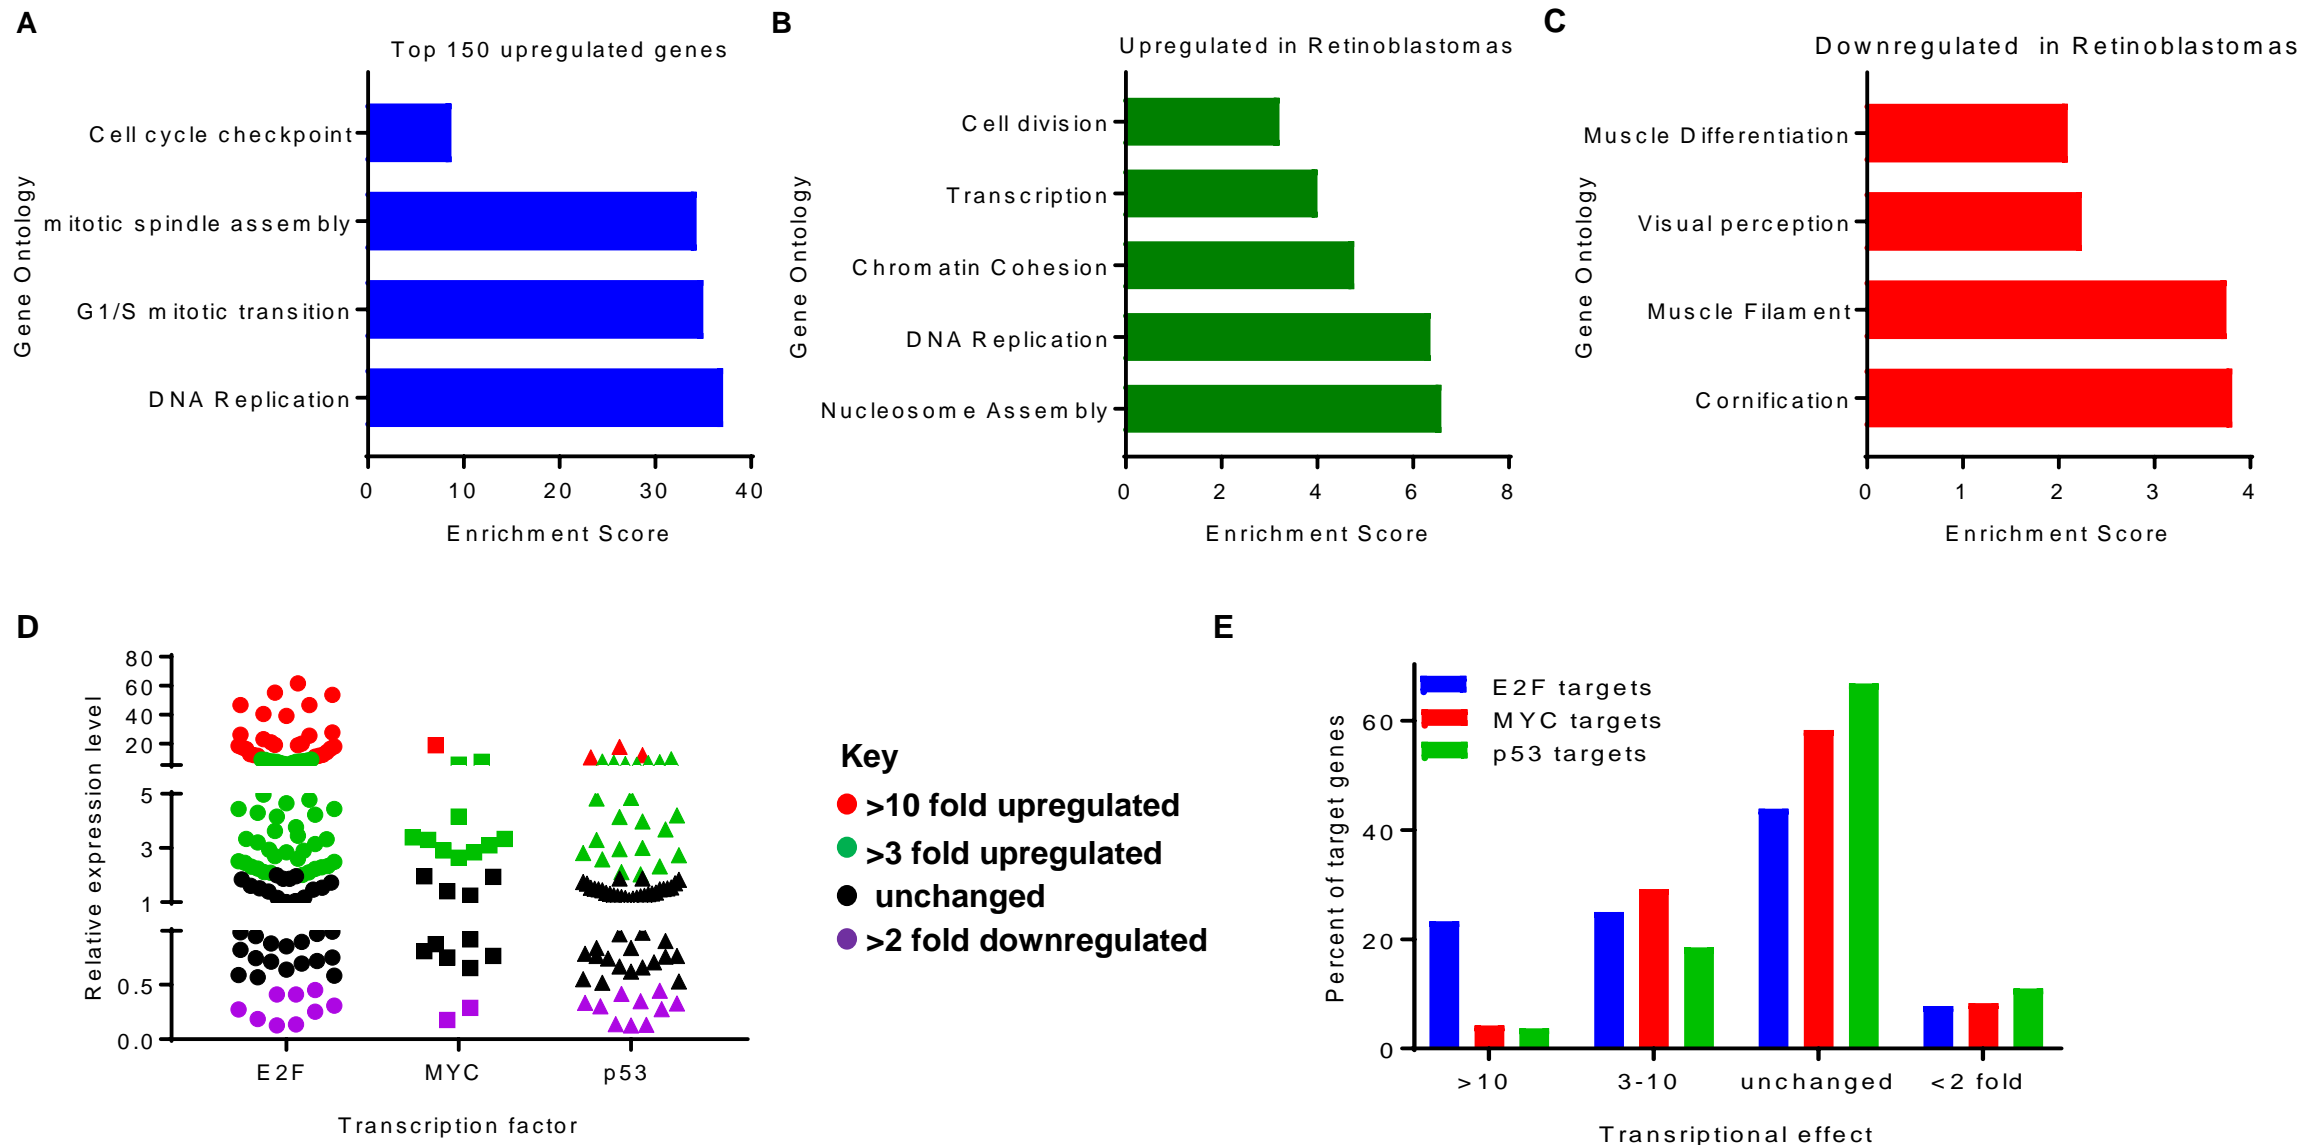

**Supp. Figure 1: Functional classification of the coding gene changes in Retinoblastoma**

**(A)** Gene Ontology of the most upregulated 150 coding genes in these tumors. **(B)** Gene Ontology of all of the upregulated coding mRNAs in Retinoblastoma. **(C)** Gene Ontology of all downregulated coding mRNAs in Retinoblastoma. **(D)** Relative expression levels of E2F, MYC and p53 target genes in Retinoblastoma. **(E)** Relative transcriptional effect on E2F, MYC and p53 target genes in tumors.

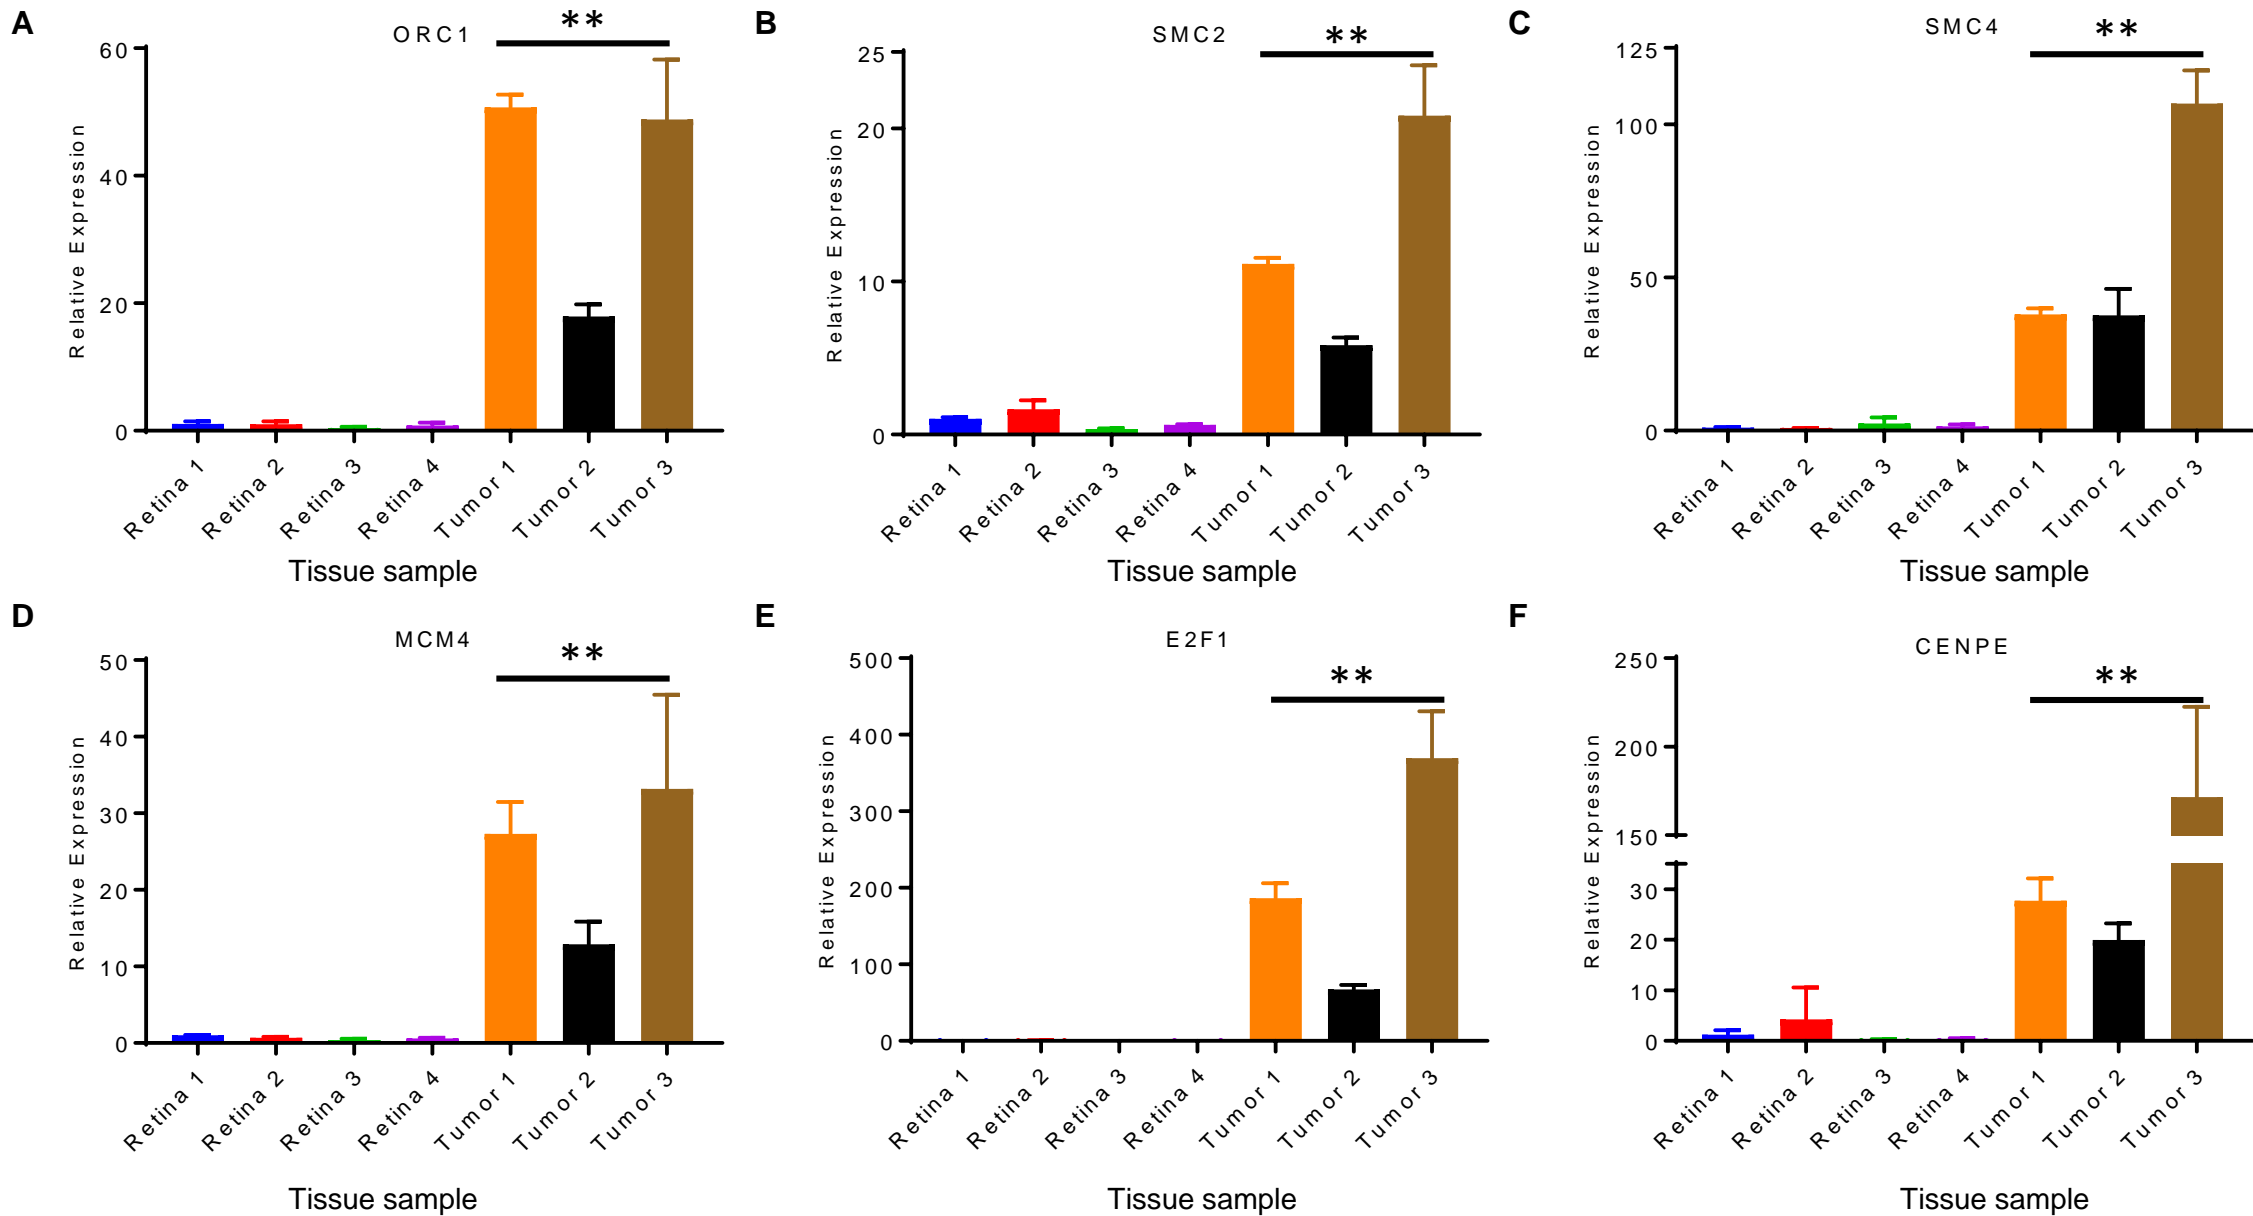

**Supp. Figure 2: E2F target gene expression in an independent cohort of tumors**

**(A)** RT-PCR Relative expression of ORC1 from four control retinas and three Retinoblastoma tumors from an independent cohort (\* $p < 0.05$ ). **(B)** RT-PCR Relative expression of SMC2, **(C)** SMC4, **(D)** MCM4, **(E)** E2F1 and **(F)** CENPE from control retina and three Retinoblastoma tumors from an independent cohort (\* $p < 0.05$ ).

**A**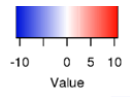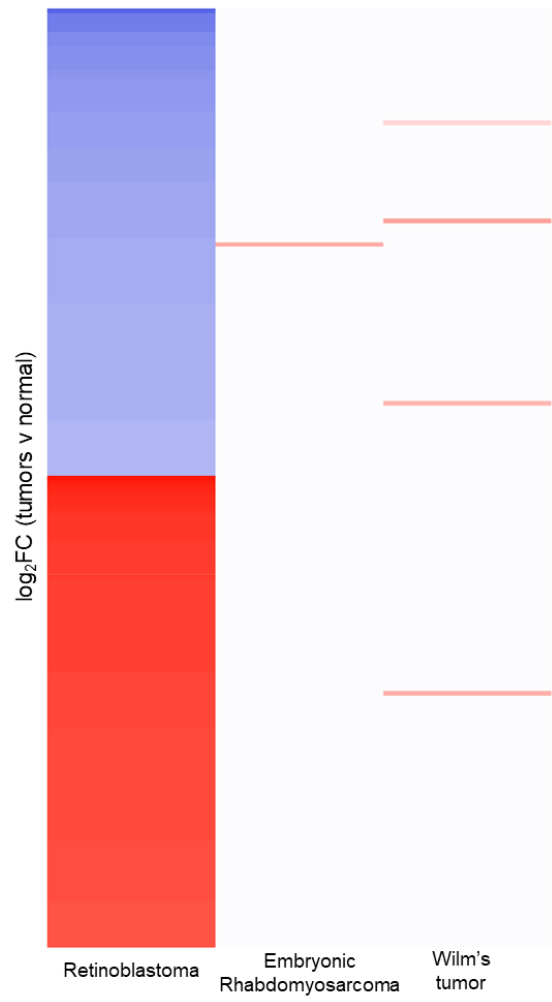**B**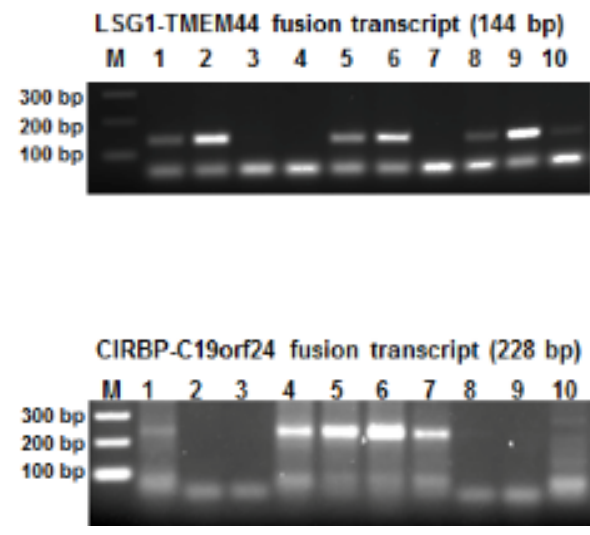**Rajasekaran Supp Fig3**

**Supp. Figure 3: Retinoblastoma RNA signature and RNA-fusions are unique.**  
**(A)** Heat map of upregulated (red) and downregulated (blue) genes in Retinoblastoma compared to other pediatric tumors. **(B)** RT-PCR results from RNA-fusion testing in Retinoblastoma tumors.
